# Supplementary material
Source: PubMed Central journal article supplement (PMC4174679)
Supplement: NIHMS598976-supplement-1.pdf [file NIHMS598976-supplement-1.pdf]

Supplemental materials:

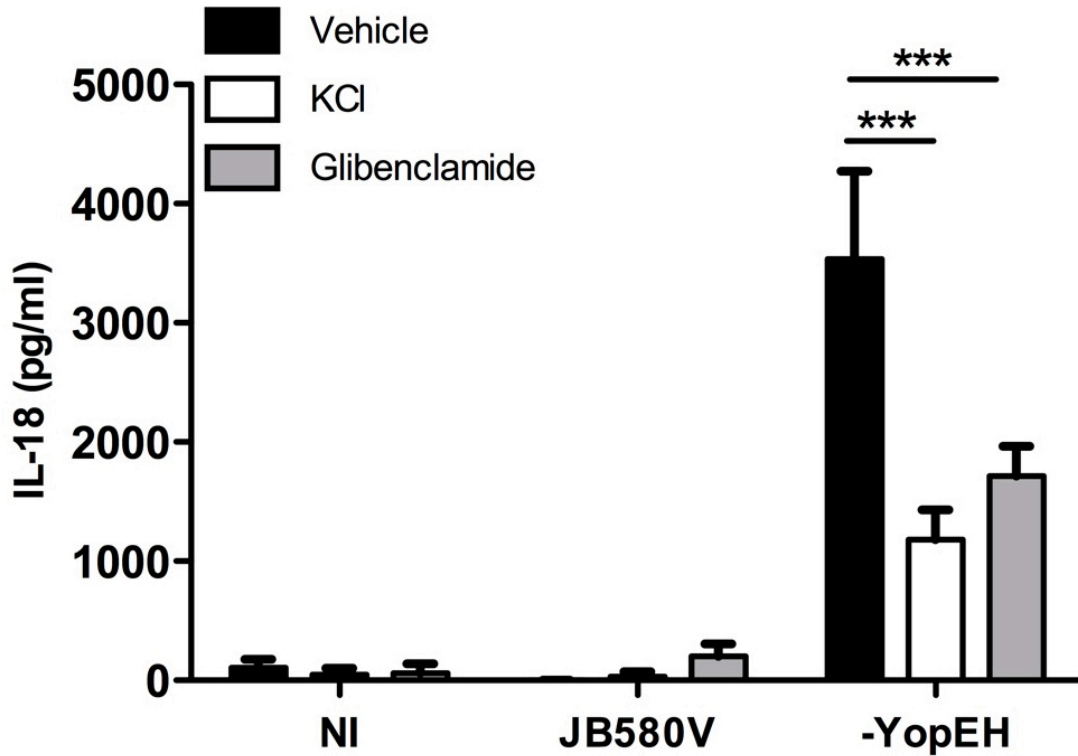

**Figure S1. IL-18 secretion is dependent on K<sup>+</sup> efflux.** (Related to Figure 2) Caco-2 cells were treated with 50 $\mu$ M glibenclamide, 130mM KCl, or DMSO for 30 min before infection with wild type or *yopEH* mutant *Y. enterocolitica*. Cell culture supernatants were collected post infection and analyzed for secreted IL-18 by ELISA. The data represent the mean  $\pm$  SD of triplicate samples from two independent experiments. \*p < 0.001 versus vehicle.

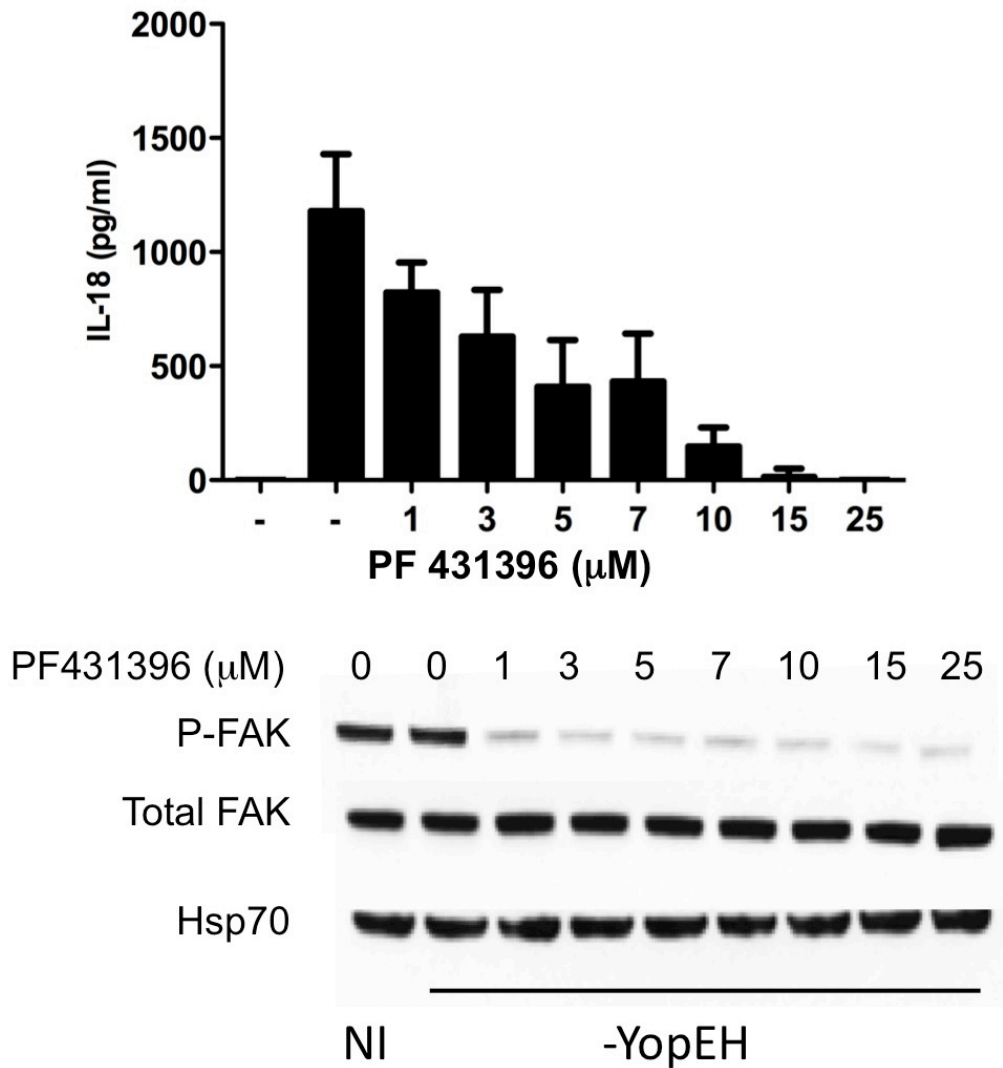

**Figure S2. IL-18 secretion is dependent on the activity of FAK.** (Related to Figure 5) Caco-2 cells were pre-treated with increasing concentrations of the FAK inhibitor PF-431396 or DMSO (0 $\mu$ M) for 1h and then infected with indicated bacterial strains at an MOI of 10. After 8 h, ELISA determined the concentration of IL-18 in the conditioned media. Cells were also lysed and subjected to immunoblot analysis of phospho-FAK, total FAK, and the loading control Hsp70. Data represents mean  $\pm$  SD of two independent experiments. \*p < 0.001.

**Table S I: Bacterial strains for infection studies**

| <b>Strain</b>           | <b>Description</b>                                                                                                   | <b>Source or Reference</b>                                           |
|-------------------------|----------------------------------------------------------------------------------------------------------------------|----------------------------------------------------------------------|
| JB580V                  | Wild-type <i>Y. enterocolitica</i> 8081v - <i>yenR</i> (r <sup>-</sup> m <sup>+</sup> )                              | (Kinder et al., 1993)                                                |
| JB580C                  | JB580V cured of virulence plasmid pYVe8081; lacks Ysc/Yop T3SS                                                       | (Pepe and Miller, 1993)                                              |
| -YopP                   | JB580V <i>yopP</i>                                                                                                   | (Bose et al., 2012)                                                  |
| -YopE                   | JB580V <i>yopE</i>                                                                                                   | This work                                                            |
| -YopH                   | JB580V <i>yopH</i>                                                                                                   | This work                                                            |
| -YopEH                  | JB580V <i>yopEH</i>                                                                                                  | This work                                                            |
| -YopQ                   | JB580V <i>yopQ</i>                                                                                                   | This work                                                            |
| -Inv                    | JB580V <i>inv</i>                                                                                                    | gift from Virginia Miller (UNC Chapel Hill)                          |
| JB580C -Inv             | JB580C <i>inv</i>                                                                                                    | This work                                                            |
| -YopEH -Inv             | JB580V <i>yopEH inv</i>                                                                                              | This work                                                            |
| STm                     | <i>Salmonella enterica</i> subsp. <i>enterica</i> (ex Kauffmann and Edwards) Le Minor and Popoff serovar Typhimurium | (ATCC® 14028™)                                                       |
| <i>E. coli</i> Inv      | HB101 (pMV101) <i>E. coli</i> expressing <i>Y. enterocolitica</i> Invasin                                            | (Pepe and Miller, 1990); gift from Virginia Miller (UNC Chapel Hill) |
| <i>E. coli</i> vector   | HB101 pMV101                                                                                                         | (Pepe and Miller, 1990);                                             |
| <i>E. coli</i> InvD760A | <i>E. coli</i> expressing <i>inv</i> with D760A                                                                      | This work                                                            |
| <i>E. coli</i> InvD809A | <i>E. coli</i> expressing <i>inv</i> with D809A                                                                      | This work                                                            |

**Table S II: Primers used in this study:**

| <b>Oligo sequence 5'-3'</b>                          |                                                         |
|------------------------------------------------------|---------------------------------------------------------|
| YopE- Upstream                                       | YopE- Downstream                                        |
| Forward:<br><u>GTCGACGATGAGGTTTGTAGCCGT</u><br>TC    | Forward:<br><u>TTAATTAAGTGATATGGTGACTAGTCC</u><br>TGC   |
| Reverse:<br><u>TTAATTA</u> ACTTAGTGGGAAAATAG<br>CCGG | Reverse:<br>CCCTGCCTCTTACTCTACTTC                       |
| YopH- Upstream                                       | YopH-Downstream                                         |
| Forward:<br><u>GTCGACGATAATACCCCCAGGTTG</u><br>A     | Forward:<br><u>TTAATTAAGGACAAGGGCGACCATTA</u><br>TT     |
| Reverse:<br><u>TTAATTA</u><br>GGTGAGCCGTGTATTTTCAT   | Reverse:<br>CTGGCACCTATCAATGAGAAGG                      |
| YopQ- Upstream                                       | YopQ- Downstream                                        |
| Forward:<br><u>GTCGACGATGCAGAACTGGCGAAT</u><br>AC    | Forward:<br><u>TTAATTA</u> ACTACTCTCAATGAGCTTCC<br>CATG |
| Reverse:<br><u>TTAATTA</u> GAGATCTTCCGGCATACT<br>GAC | Reverse:<br>GTAGTGTCCGTGAATACTGTCC                      |
| <b>Primers used for RT-PCR</b>                       |                                                         |
| <b>Oligo sequence 5'-3'</b>                          |                                                         |

|                                                           |
|-----------------------------------------------------------|
| GAPDH                                                     |
| Forward: GTCAGTGGTGGACCTGACCT                             |
| Reverse: AGGGGTCTACATGGCAACTG                             |
| Caspase-1                                                 |
| Forward: ATCCGTTCCATGGGTGAAGGTACA                         |
| Reverse: CAAATGCCTCCAGCTCTGTA                             |
| NLRP3                                                     |
| Forward: TTCTTTCTGTTTGCTGAGTTTTTG                         |
| Reverse: TTCCTGGCATATCACAGTGG                             |
| <b>Primers used for invasin site-directed mutagenesis</b> |
| <b>Oligo sequence 5'-3'</b>                               |
| Inv D760A                                                 |
| Forward: GCCAGCGCACTGCCTTTACTGCGCTGATC                    |
| Reverse: GATCAGCGCAGTAAAGGCAGTGCCTGGC                     |
| Inv D809A                                                 |
| Forward : GACCAGTACAGCCTTTGTCACCTATGG                     |
| Reverse: CCATAGTGACAAAGGCTGTACTGGTC                       |
